# Supplementary material for: PVPred-SCM: Improved Prediction and Analysis of Phage Virion Proteins Using a Scoring Card Method
Source: MDPI journal article supplement (doi:10.3390/cells9020353), 2020-02-03
Supplement: s1 [file s1]

## Supplementary files

**Table S1.** Performance comparisons between PVPred-SCM with existing methods on independent dataset derived from Zhang et al's method [11].

| Method                            | ACC (%) | SN (%) | SP (%) | MCC  |
|-----------------------------------|---------|--------|--------|------|
| Feng et al's method <sup>a</sup>  | 67.50   | 75.00  | 62.00  | 0.37 |
| PVPred <sup>a</sup>               | 72.50   | 60.30  | 81.50  | 0.43 |
| Zhang et al's method <sup>a</sup> | 83.10   | 85.30  | 81.50  | 0.66 |
| PVPred-SCM                        | 74.40   | 72.10  | 76.10  | 0.48 |

<sup>a</sup> Results were reported from the work of Zhang et al's method [11].

**Table S2.** The ten top-ranked informative physicochemical properties having the highest pearson correlation (R) with the propensity scores of amino acids

| Rank | AAindex    | Correlation R | Description                                                                                                         |
|------|------------|---------------|---------------------------------------------------------------------------------------------------------------------|
| 1    | FUKS010107 | 0.593         | Interior composition of amino acids in extracellular proteins of mesophiles (percent) (Fukuchi-Nishikawa, 2001)     |
| 2    | FUKS010111 | 0.542         | Entire chain composition of amino acids in extracellular proteins of mesophiles (percent) (Fukuchi-Nishikawa, 2001) |
| 3    | JACR890101 | 0.523         | Weights from the IFH scale (Jacobs-White, 1989)                                                                     |
| 4    | PRAM820102 | 0.522         | Slope in regression analysis $\times 1.0E1$ (Prabhakaran-Ponnuswamy, 1982)                                          |
| 5    | QIAN880126 | 0.521         | Weights for beta-sheet at the window position of 6 (Qian-Sejnowski, 1988)                                           |
| 6    | SNEP660102 | 0.516         | Principal component II (Sneath, 1966)                                                                               |
| 7    | KOEP990101 | 0.502         | Alpha-helix propensity derived from designed sequences (Koehl-Levitt, 1999)                                         |
| 8    | QIAN880124 | 0.498         | Weights for beta-sheet at the window position of 4 (Qian-Sejnowski, 1988)                                           |
| 9    | RADA880105 | 0.485         | Transfer free energy from vap to oct (Radzicka-Wolfenden, 1988)                                                     |
| 10   | WOLR790101 | 0.484         | Hydrophobicity index (Wolfenden et al., 1979)                                                                       |

**Table S3.** The ten top-ranked informative physicochemical properties having the lowest pearson correlation (R) with the propensity scores of amino acids

| Rank | AAindex    | Correlation R | Description                                                                |
|------|------------|---------------|----------------------------------------------------------------------------|
| 1    | HUTJ700102 | -0.760        | Absolute entropy (Hutchens, 1970)                                          |
| 2    | HUTJ700103 | -0.720        | Entropy of formation (Hutchens, 1970)                                      |
| 3    | ZIMJ680103 | -0.715        | Polarity (Zimmerman et al., 1968)                                          |
| 4    | FAUJ880104 | -0.695        | STERIMOL length of the side chain (Fauchere et al., 1988)                  |
| 5    | LEVM760105 | -0.662        | Radius of gyration of side chain (Levitt, 1976)                            |
| 6    | FAUJ880111 | -0.640        | Positive charge (Fauchere et al., 1988)                                    |
| 7    | CHAM830104 | -0.640        | The number of atoms in the side chain labelled 2+1 (Charton-Charton, 1983) |
| 8    | LEVM760102 | -0.625        | Distance between C-alpha and centroid of side chain (Levitt, 1976)         |
| 9    | GEIM800101 | -0.618        | Alpha-helix indices (Geisow-Roberts, 1980)                                 |
| 10   | EISD860102 | -0.584        | Atom-based hydrophobic moment (Eisenberg-McLachlan, 1986)                  |
